# Supplementary material for: Cross-Sectional Association of Blood Selenium with Glycemic Biomarkers among U.S. Adults with Normoglycemia in the National Health and Nutrition Examination Survey 2013–2016
Source: MDPI journal article supplement (doi:10.3390/nu14193972), 2022-09-24
Supplement: s1 [file s1]

# **Cross-Sectional Association of Blood Selenium with Glycemic Biomarkers among U.S. Adults with Normoglycemia in the National Health and Nutrition Examination Survey 2013–2016**

## **Supplemental material**

Jingli Yang <sup>1,2,†</sup>, En Chen <sup>3,†</sup>, Cheukling Choi <sup>4</sup>, Kayue Chan <sup>4</sup>, Qinghua Yang <sup>5</sup>, Juwel Rana <sup>6,7</sup>,  
Bo Yang <sup>8</sup>, Chuiguo Huang <sup>9</sup>, Aimin Yang <sup>9,\*</sup> and Kenneth Lo <sup>4,10,\*</sup>

<sup>1</sup> College of Earth and Environmental Sciences, Lanzhou University, Lanzhou 730000, China

<sup>2</sup> School of Public Health and Social Work, Queensland University of Technology, Brisbane, QLD 4059, Australia

<sup>3</sup> Department of Clinical Laboratory Medicine, Institution of Microbiology and Infectious Diseases, The First Affiliated Hospital, Hengyang Medical School, University of South China, Hengyang 421001, China

<sup>4</sup> Department of Applied Biology and Chemical Technology, the Hong Kong Polytechnic University, 11 Yuk Choi Road, Hung Hom, Kowloon, Hong Kong SAR, China

<sup>5</sup> Department of Nephrology, Peking University International Hospital, Beijing 102206, China

<sup>6</sup> Department of Epidemiology, Biostatistics and Occupational Health, Faculty of Medicine and Health Sciences, McGill University, Montreal, QC H3A 1G1, Canada

<sup>7</sup> Department of Public Health, School of Health and Life Sciences, North South University, Dhaka 1229, Bangladesh

<sup>8</sup> Department of Epidemiology and Center for Global Cardiometabolic Health, School of Public Health, Brown University, Providence, Rhode Island, 02912, USA

<sup>9</sup> Department of Medicine and Therapeutics, Prince of Wales Hospital, the Chinese University of Hong Kong, Hong Kong SAR, 999077, China

<sup>10</sup> Research Institute for Smart Ageing, The Hong Kong Polytechnic University, 11 Yuk Choi Road, Hung Hom, Kowloon, Hong Kong SAR, China

\* Correspondence: aiminyang@cuhk.edu.hk (Yang, A.); khklo@polyu.edu.hk (Lo, K.)

† These authors contributed equally to this work.

|                                                                                                                                                                   |    |
|-------------------------------------------------------------------------------------------------------------------------------------------------------------------|----|
| <b>Table S1.</b> Collinearity analysis (variance inflation factor, VIFs) .....                                                                                    | 3  |
| <b>Table S2.</b> Regression coefficients ( $\beta$ ) for the association between blood selenium and glycaemic biomarkers stratified by sex .....                  | 4  |
| <b>Table S3.</b> Regression coefficients ( $\beta$ ) for the association between blood selenium and glycaemic biomarkers stratified by hypertension history ..... | 5  |
| <b>Table S4.</b> Regression coefficients ( $\beta$ ) for the association between blood selenium and glycaemic biomarkers stratified by BMI category .....         | 6  |
| <b>Table S5.</b> Regression coefficients ( $\beta$ ) for the association between blood selenium and glycaemic biomarkers stratified by age .....                  | 7  |
| <b>Table S6.</b> Regression coefficients ( $\beta$ ) for the association between blood selenium and glycaemic biomarkers stratified by smoking status .....       | 8  |
| <b>Table S7.</b> Sensitivity analysis on the association between blood selenium and glycaemic biomarkers by including people with diabetes (total n= 3,226) ..... | 9  |
| <b>Table S8.</b> The values of the lowest (Q1) to the highest (Q4) quartiles for blood Se .....                                                                   | 10 |

**Table S1.** Collinearity analysis (variance inflation factor, VIFs) and the lower limit of detections (LLOD)

|                | VIFs         |               |           |                 | LLODs      |
|----------------|--------------|---------------|-----------|-----------------|------------|
|                | FPG (mmol/L) | OGTT (mmol/L) | HbA1c (%) | Insulin (uU/ml) |            |
| Cadmium (Cd)   | 1.06         | 1.05          | 1.04      | 1.06            | 0.1 µg/L   |
| Manganese (Mn) | 1.01         | 1.01          | 1.01      | 1.01            | 0.99 µg/L  |
| Mercury (Hg)   | 1.04         | 1.05          | 1.03      | 1.04            | 0.28 µg/L  |
| Selenium (Se)  | 1.02         | 1.03          | 1.02      | 1.02            | 24.48 µg/L |
| Lead (Pb)      | 1.08         | 1.06          | 1.05      | 1.08            | 0.07 ug/dL |

**Table S2.** Regression coefficients ( $\beta$ ) for the association between blood selenium and glycaemic biomarkers stratified by sex

|                              | FPG (mmol/L)       | OGTT (mmol/L)       | HbA1c (%)           | Insulin (uU/ml)      |
|------------------------------|--------------------|---------------------|---------------------|----------------------|
| <b>Men</b>                   |                    |                     |                     |                      |
| Blood Se ( $\mu\text{g/L}$ ) |                    |                     |                     |                      |
| Q1                           | 0.00 (Reference)   | 0.00 (Reference)    | 0.00 (Reference)    | 0.00 (Reference)     |
| Q2                           | 0.20 (0.09, 0.32)  | -0.09 (-0.51, 0.33) | 0.04 (-0.02, 0.09)  | 2.14 (-0.16, 4.44)   |
| Q3                           | 0.23 (0.12, 0.35)  | 0.08 (-0.33, 0.49)  | 0.05 (0.00, 0.10)   | 3.59 (1.33, 5.86)    |
| Q4                           | 0.15 (0.04, 0.26)  | 0.25 (-0.17, 0.66)  | 0.03 (-0.02, 0.08)  | 2.56 (0.30, 4.83)    |
| P for trend                  | 0.02               | 0.16                | 0.23                | 0.02                 |
| Log <sub>10</sub> Se         | 1.08 (0.31, 1.85)  | 1.49 (-1.31, 4.30)  | 0.20 (-0.15, 0.55)  | 16.33 (1.07, 31.60)  |
| <b>Women</b>                 |                    |                     |                     |                      |
| Blood Se ( $\mu\text{g/L}$ ) |                    |                     |                     |                      |
| Q1                           | 0.00 (Reference)   | 0.00 (Reference)    | 0.00 (Reference)    | 0.00 (Reference)     |
| Q2                           | 0.01 (-0.10, 0.12) | 0.45 (0.11, 0.80)   | 0.00 (-0.05, 0.05)  | 0.61 (-1.17, 2.39)   |
| Q3                           | 0.01 (-0.11, 0.13) | 0.46 (0.07, 0.84)   | -0.01 (-0.06, 0.05) | 1.19 (-0.73, 3.12)   |
| Q4                           | 0.10 (-0.01, 0.22) | 0.36 (-0.01, 0.73)  | 0.04 (-0.01, 0.09)  | 2.43 (0.53, 4.33)    |
| P for trend                  | 0.11               | 0.06                | 0.20                | 0.01                 |
| Log <sub>10</sub> Se         | 0.26 (-0.54, 1.05) | 2.04 (-0.51, 4.58)  | 0.29 (-0.07, 0.64)  | 12.53 (-0.61, 25.67) |
| P interaction                | 0.78               | 0.57                | 0.94                | 0.88                 |

Model was adjusted for age, race, education level, ratio of family income to poverty, smoking status, alcohol drinking status, body mass index, dietary energy, hypertension history, the levels of blood lead, cadmium, manganese and mercury. Q1, <180; Q2, 180 – 194; Q3, 194 – 208; Q4,  $\geq$ 208.

**Table S3.** Regression coefficients ( $\beta$ ) for the association between blood selenium and glycaemic biomarkers stratified by hypertension history

|                              | FPG (mmol/L)       | OGTT (mmol/L)      | HbA1c (%)          | Insulin (uU/ml)      |
|------------------------------|--------------------|--------------------|--------------------|----------------------|
| Without hypertension         |                    |                    |                    |                      |
| Blood Se ( $\mu\text{g/L}$ ) |                    |                    |                    |                      |
| Q1                           | 0.00 (Reference)   | 0.00 (Reference)   | 0.00 (Reference)   | 0.00 (Reference)     |
| Q2                           | 0.05 (-0.04, 0.14) | 0.20 (-0.12, 0.52) | 0.01 (-0.03, 0.05) | 1.41 (-0.31, 3.14)   |
| Q3                           | 0.16 (0.07, 0.26)  | 0.21 (-0.13, 0.55) | 0.02 (-0.03, 0.06) | 3.39 (1.57, 5.22)    |
| Q4                           | 0.14 (0.05, 0.23)  | 0.23 (-0.10, 0.56) | 0.01 (-0.03, 0.06) | 3.15 (1.38, 4.92)    |
| P for trend                  | <0.01              | 0.18               | 0.46               | <0.01                |
| Log <sub>10</sub> Se         | 0.99 (0.34, 1.64)  | 1.60 (-0.78, 3.97) | 0.14 (-0.14, 0.43) | 21.70 (9.19, 34.21)  |
| With hypertension            |                    |                    |                    |                      |
| Blood Se ( $\mu\text{g/L}$ ) |                    |                    |                    |                      |
| Q1                           | 0.00 (Reference)   | 0.00 (Reference)   | 0.00 (Reference)   | 0.00 (Reference)     |
| Q2                           | 0.17 (0.01, 0.33)  | 0.12 (-0.4, 0.63)  | 0.04 (-0.03, 0.11) | 1.17 (-1.38, 3.72)   |
| Q3                           | 0.05 (-0.11, 0.21) | 0.14 (-0.38, 0.66) | 0.04 (-0.03, 0.11) | 1.15 (-1.38, 3.69)   |
| Q4                           | 0.07 (-0.1, 0.23)  | 0.36 (-0.17, 0.89) | 0.07 (0.00, 0.14)  | 0.68 (-1.95, 3.31)   |
| P for trend                  | 0.73               | 0.19               | 0.05               | 0.66                 |
| Log <sub>10</sub> Se         | 0.22 (-0.83, 1.27) | 1.14 (-2.13, 4.41) | 0.43 (-0.04, 0.90) | 3.63 (-13.22, 20.48) |
| P interaction                | 0.09               | 0.66               | 0.06               | 0.11                 |

Model was adjusted for sex, age, race, education level, ratio of family income to poverty, smoking status, alcohol drinking status, body mass index, dietary energy, and the levels of blood lead, cadmium, manganese and mercury. Q1, <180; Q2, 180 – 194; Q3, 194 – 208; Q4,  $\geq$ 208.

**Table S4.** Regression coefficients ( $\beta$ ) for the association between blood selenium and glycaemic biomarkers stratified by BMI category

|                                   | FPG (mmol/L)       | OGTT (mmol/L)       | HbA1c (%)           | Insulin (uU/ml)     |
|-----------------------------------|--------------------|---------------------|---------------------|---------------------|
| $\leq 25 \text{ kg/m}^2$          |                    |                     |                     |                     |
| Blood Se ( $\mu\text{g/L}$ )      |                    |                     |                     |                     |
| Q1                                | 0.00 (Reference)   | 0.00 (Reference)    | 0.00 (Reference)    | 0.00 (Reference)    |
| Q2                                | 0.09 (-0.04, 0.23) | 0.29 (-0.18, 0.76)  | 0.04 (-0.01, 0.10)  | 0.01 (-1.65, 1.66)  |
| Q3                                | 0.09 (-0.05, 0.23) | -0.02 (-0.53, 0.48) | 0.01 (-0.05, 0.07)  | 0.61 (-1.15, 2.38)  |
| Q4                                | 0.16 (0.03, 0.29)  | 0.27 (-0.20, 0.75)  | 0.04 (-0.02, 0.10)  | 1.14 (-0.51, 2.78)  |
| P for trend                       | 0.02               | 0.41                | 0.33                | 0.14                |
| Log <sub>10</sub> Se              | 0.51 (-0.33, 1.35) | 0.96 (-2.00, 3.92)  | 0.16 (-0.23, 0.54)  | 5.75 (-4.88, 16.39) |
| $25.1\text{-}29.9 \text{ kg/m}^2$ |                    |                     |                     |                     |
| Blood Se ( $\mu\text{g/L}$ )      |                    |                     |                     |                     |
| Q1                                | 0.00 (Reference)   | 0.00 (Reference)    | 0.00 (Reference)    | 0.00 (Reference)    |
| Q2                                | 0.12 (-0.03, 0.27) | 0.19 (-0.33, 0.72)  | 0.02 (-0.04, 0.08)  | 1.83 (-0.49, 4.14)  |
| Q3                                | 0.11 (-0.05, 0.26) | 0.37 (-0.17, 0.90)  | 0.01 (-0.06, 0.07)  | 2.98 (0.63, 5.32)   |
| Q4                                | 0.07 (-0.08, 0.22) | 0.63 (0.10, 1.15)   | 0.01 (-0.05, 0.08)  | 1.75 (-0.60, 4.10)  |
| P for trend                       | 0.47               | 0.01                | 0.86                | 0.12                |
| Log <sub>10</sub> Se              | 0.83 (-0.20, 1.85) | 4.14 (0.50, 7.77)   | 0.30 (-0.14, 0.73)  | 16.70 (1.06, 32.35) |
| $\geq 30 \text{ kg/m}^2$          |                    |                     |                     |                     |
| Blood Se ( $\mu\text{g/L}$ )      |                    |                     |                     |                     |
| Q1                                | 0.00 (Reference)   | 0.00 (Reference)    | 0.00 (Reference)    | 0.00 (Reference)    |
| Q2                                | 0.06 (-0.07, 0.19) | 0.29 (-0.14, 0.71)  | -0.01 (-0.07, 0.05) | 2.96 (-0.14, 6.06)  |
| Q3                                | 0.17 (0.03, 0.31)  | 0.53 (0.08, 0.97)   | 0.05 (-0.01, 0.11)  | 5.25 (2.01, 8.50)   |
| Q4                                | 0.14 (0.00, 0.28)  | 0.19 (-0.27, 0.65)  | 0.05 (-0.02, 0.12)  | 4.99 (1.61, 8.36)   |
| P for trend                       | 0.02               | 0.25                | 0.06                | <0.01               |
| Log <sub>10</sub> Se              | 0.95 (-0.10, 2.00) | 1.46 (-2.02, 4.94)  | 0.31 (-0.15, 0.77)  | 31.53 (6.07, 56.98) |
| P interaction                     | 0.90               | 0.62                | 0.51                | 0.02                |

Model was adjusted for sex, age, race, education level, ratio of family income to poverty, smoking status, alcohol drinking status, dietary energy, hypertension history, the levels of blood lead, cadmium, manganese and mercury. Q1, <180; Q2, 180 – 194; Q3, 194 – 208; Q4,  $\geq 208$ .

**Table S5.** Regression coefficients ( $\beta$ ) for the association between blood selenium and glycaemic biomarkers stratified by age

|                                   | FPG (mmol/L)        | OGTT (mmol/L)       | HbA1c (%)           | Insulin (uU/ml)      |
|-----------------------------------|---------------------|---------------------|---------------------|----------------------|
| <b>18-39 years</b>                |                     |                     |                     |                      |
| Blood Se ( $\mu\text{g/L}$ )      |                     |                     |                     |                      |
| Q1                                | 0.00 (Reference)    | 0.00 (Reference)    | 0.00 (Reference)    | 0.00 (Reference)     |
| Q2                                | 0.09 (-0.03, 0.21)  | 0.54 (0.12, 0.96)   | 0.01 (-0.04, 0.07)  | 1.74 (-0.81, 4.28)   |
| Q3                                | 0.20 (0.07, 0.32)   | 0.58 (0.14, 1.02)   | 0.03 (-0.03, 0.08)  | 3.64 (0.98, 6.31)    |
| Q4                                | 0.18 (0.06, 0.30)   | 0.67 (0.24, 1.09)   | 0.01 (-0.04, 0.07)  | 2.57 (0.00, 5.14)    |
| P for trend                       | <0.01               | <0.01               | 0.57                | 0.03                 |
| Log <sub>10</sub> Se              | 1.58 (0.68, 2.48)   | 4.61 (1.40, 7.82)   | 0.06 (-0.34, 0.46)  | 19.60 (0.50, 38.71)  |
| <b>40-59 years</b>                |                     |                     |                     |                      |
| Blood Se ( $\mu\text{g/L}$ )      |                     |                     |                     |                      |
| Q1                                | 0.00 (Reference)    | 0.00 (Reference)    | 0.00 (Reference)    | 0.00 (Reference)     |
| Q2                                | 0.21 (0.07, 0.34)   | 0.02 (-0.42, 0.46)  | 0.06 (0.00, 0.12)   | 1.39 (-0.66, 3.43)   |
| Q3                                | 0.15 (0.01, 0.30)   | -0.13 (-0.56, 0.34) | 0.04 (-0.02, 0.10)  | 2.86 (0.71, 5.02)    |
| Q4                                | 0.16 (0.02, 0.30)   | 0.13 (-0.32, 0.59)  | 0.07 (0.01, 0.14)   | 4.22 (2.12, 6.32)    |
| P for trend                       | 0.05                | 0.68                | 0.03                | <0.01                |
| Log <sub>10</sub> Se              | 0.54 (-0.41, 1.48)  | 0.48 (-2.63, 3.58)  | 0.56 (0.16, 0.97)   | 23.12 (8.80, 37.44)  |
| <b><math>\geq 60</math> years</b> |                     |                     |                     |                      |
| Blood Se ( $\mu\text{g/L}$ )      |                     |                     |                     |                      |
| Q1                                | 0.00 (Reference)    | 0.00 (Reference)    | 0.00 (Reference)    | 0.00 (Reference)     |
| Q2                                | -0.05 (-0.24, 0.13) | -0.43 (-1.11, 0.25) | -0.03 (-0.12, 0.05) | 1.74 (-1.35, 4.82)   |
| Q3                                | -0.06 (-0.25, 0.12) | -0.15 (-0.83, 0.53) | 0.00 (-0.08, 0.08)  | 1.57 (-1.49, 4.63)   |
| Q4                                | 0.00 (-0.20, 0.20)  | -0.05 (-0.77, 0.67) | 0.04 (-0.04, 0.13)  | 2.24 (-1.04, 5.53)   |
| P for trend                       | 0.90                | 0.95                | 0.25                | 0.20                 |
| Log <sub>10</sub> Se              | -0.03 (-1.20, 1.15) | -0.17 (-4.36, 4.02) | 0.16 (-0.38, 0.70)  | 13.01 (-6.53, 32.55) |
| P interaction                     | 0.07                | 0.04                | 0.30                | 0.84                 |

Model was adjusted for sex, race, education level, ratio of family income to poverty, smoking status, alcohol drinking status, body mass index, dietary energy, hypertension history, the levels of blood lead, cadmium, manganese and mercury. Q1, <180; Q2, 180 – 194; Q3, 194 – 208; Q4,  $\geq 208$ .

**Table S6.** Regression coefficients ( $\beta$ ) for the association between blood selenium and glycaemic biomarkers stratified by smoking status

|                              | FPG (mmol/L)        | OGTT (mmol/L)       | HbA1c (%)           | Insulin (uU/ml)      |
|------------------------------|---------------------|---------------------|---------------------|----------------------|
| Never smoker                 |                     |                     |                     |                      |
| Blood Se ( $\mu\text{g/L}$ ) |                     |                     |                     |                      |
| Q1                           | 0.00 (Reference)    | 0.00 (Reference)    | 0.00 (Reference)    | 0.00 (Reference)     |
| Q2                           | 0.08 (-0.03, 0.19)  | 0.41 (0.05, 0.76)   | 0.01 (-0.04, 0.06)  | 1.91 (-0.17, 3.98)   |
| Q3                           | 0.10 (0.00, 0.21)   | 0.27 (-0.10, 0.63)  | 0.01 (-0.04, 0.06)  | 2.22 (0.13, 4.31)    |
| Q4                           | 0.07 (-0.05, 0.18)  | 0.35 (-0.02, 0.72)  | 0.06 (0.01, 0.11)   | 2.49 (0.33, 4.65)    |
| P for trend                  | 0.23                | 0.12                | 0.02                | 0.03                 |
| Log <sub>10</sub> Se         | 0.01 (-0.72, 0.75)  | 1.39 (-1.08, 3.85)  | 0.36 (0.02, 0.69)   | 13.03 (-1.21, 27.27) |
| Former smoker                |                     |                     |                     |                      |
| Blood Se ( $\mu\text{g/L}$ ) |                     |                     |                     |                      |
| Q1                           | 0.00 (Reference)    | 0.00 (Reference)    | 0.00 (Reference)    | 0.00 (Reference)     |
| Q2                           | -0.09 (-0.25, 0.08) | -0.18 (-0.82, 0.46) | 0.01 (-0.07, 0.09)  | 1.81 (-1.44, 5.06)   |
| Q3                           | 0.02 (-0.15, 0.20)  | 0.26 (-0.40, 0.91)  | 0.00 (-0.08, 0.08)  | 3.98 (0.62, 7.34)    |
| Q4                           | 0.02 (-0.15, 0.19)  | -0.12 (-0.76, 0.51) | -0.02 (-0.1, 0.06)  | 3.59 (0.33, 6.85)    |
| P for trend                  | 0.58                | 0.92                | 0.50                | 0.02                 |
| Log <sub>10</sub> Se         | 0.73 (-0.47, 1.92)  | 0.35 (-4.20, 4.90)  | -0.14 (-0.67, 0.39) | 20.59 (-2.72, 43.90) |
| Current smoker               |                     |                     |                     |                      |
| Blood Se ( $\mu\text{g/L}$ ) |                     |                     |                     |                      |
| Q1                           | 0.00 (Reference)    | 0.00 (Reference)    | 0.00 (Reference)    | 0.00 (Reference)     |
| Q2                           | 0.23 (0.07, 0.39)   | -0.12 (-0.68, 0.45) | 0.04 (-0.03, 0.12)  | 0.47 (-1.95, 2.90)   |
| Q3                           | 0.23 (0.05, 0.40)   | -0.06 (-0.69, 0.57) | 0.11 (0.03, 0.19)   | 3.22 (0.51, 5.94)    |
| Q4                           | 0.35 (0.18, 0.52)   | 0.50 (-0.10, 1.10)  | 0.03 (-0.05, 0.10)  | 0.56 (-1.99, 3.11)   |
| P for trend                  | 0.00                | 0.13                | 0.28                | 0.35                 |
| Log <sub>10</sub> Se         | 2.69 (1.49, 3.89)   | 2.43 (-1.80, 6.66)  | 0.39 (-0.14, 0.92)  | 11.57 (-6.57, 29.70) |
| P interaction                | 0.01                | 0.46                | 0.76                | 0.82                 |

Model was adjusted for sex, age, race, education level, ratio of family income to poverty, alcohol drinking status, body mass index, dietary energy, hypertension history, the levels of blood lead, cadmium, manganese and mercury. Q1, <180; Q2, 180 – 194; Q3, 194 – 208; Q4,  $\geq 208$ .



**Table S7.** Sensitivity analysis on the association between blood selenium and glycaemic biomarkers by including people with and without type 2 diabetes (total n= 3,226)

|                      | FPG (mmol/L)       | OGTT (mmol/L)      | HbA1c (%)           | Insulin (uU/ml)      |
|----------------------|--------------------|--------------------|---------------------|----------------------|
| Blood Se (µg/L)      |                    |                    |                     |                      |
| Q1                   | 0.00 (Reference)   | 0.00 (Reference)   | 0.00 (Reference)    | 0.00 (Reference)     |
| Q2                   | 0.03 (-0.24, 0.30) | 0.22 (-0.20, 0.64) | -0.01 (-0.10, 0.09) | 0.90 (-1.12, 2.92)   |
| Q3                   | 0.09 (-0.19, 0.37) | 0.36 (-0.08, 0.79) | 0.07 (-0.02, 0.16)  | 1.93 (-0.12, 3.98)   |
| Q4                   | 0.29 (0.02, 0.57)  | 0.61 (0.18, 1.03)  | 0.08 (-0.01, 0.17)  | 1.88 (-0.13, 3.90)   |
| P for trend          | 0.03               | <0.01              | 0.04                | 0.05                 |
| Log <sub>10</sub> Se | 2.20 (0.33, 4.06)  | 4.05 (1.12, 6.97)  | 0.91 (0.27, 1.54)   | 12.14 (-1.66, 25.95) |

Model was adjusted for sex, age, race, education level, ratio of family income to poverty, smoking status, alcohol drinking status, body mass index, dietary energy, hypertension history, the levels of blood lead, cadmium, manganese and mercury. Q1, <180; Q2, 180 – 194; Q3, 194 – 209; Q4, ≥209.

**Table S8.** The values of the lowest (Q1) to the highest (Q4) quartiles for blood Se

| Blood selenium (µg/L)              | Q1             | Q2             | Q4             | Q4             | Overall        |
|------------------------------------|----------------|----------------|----------------|----------------|----------------|
| <b>Overall</b>                     |                |                |                |                |                |
| Mean (SD)                          | 169 (10.5)     | 188 (3.88)     | 202 (3.95)     | 227 (20.7)     | 196 (24.1)     |
| Median [Min, Max]                  | 171 [105, 181] | 188 [181, 195] | 201 [195, 209] | 221 [209, 388] | 195 [105, 388] |
| <b>Men</b>                         |                |                |                |                |                |
| Mean (SD)                          | 168 (10.8)     | 188 (3.74)     | 202 (3.91)     | 226 (17.8)     | 198 (23.3)     |
| Median [Min, Max]                  | 171 [110, 181] | 188 [181, 195] | 201 [195, 209] | 221 [209, 356] | 197 [110, 356] |
| <b>Women</b>                       |                |                |                |                |                |
| Mean (SD)                          | 169 (10.3)     | 188 (4.02)     | 202 (4.01)     | 228 (24.2)     | 194 (24.8)     |
| Median [Min, Max]                  | 171 [105, 181] | 188 [181, 195] | 201 [195, 209] | 221 [209, 388] | 192 [105, 388] |
| <b>18-39 yrs</b>                   |                |                |                |                |                |
| Mean (SD)                          | 169 (9.19)     | 188 (3.76)     | 202 (4.12)     | 225 (14.6)     | 196 (21.7)     |
| Median [Min, Max]                  | 171 [129, 181] | 188 [181, 195] | 201 [195, 209] | 221 [209, 318] | 195 [129, 318] |
| <b>40-59 yrs</b>                   |                |                |                |                |                |
| Mean (SD)                          | 169 (11.3)     | 188 (3.98)     | 202 (3.80)     | 229 (24.7)     | 196 (26.4)     |
| Median [Min, Max]                  | 171 [105, 181] | 188 [181, 195] | 202 [195, 209] | 222 [209, 388] | 194 [105, 388] |
| <b>&gt;= 60 yrs</b>                |                |                |                |                |                |
| Mean (SD)                          | 168 (11.3)     | 188 (3.98)     | 202 (3.84)     | 228 (24.1)     | 195 (25.1)     |
| Median [Min, Max]                  | 171 [120, 181] | 189 [181, 195] | 201 [196, 209] | 220 [209, 356] | 195 [120, 356] |
| <b>&lt;=25, kg/m<sup>2</sup></b>   |                |                |                |                |                |
| Mean (SD)                          | 168 (11.3)     | 188 (3.88)     | 202 (3.88)     | 228 (24.8)     | 195 (26.0)     |
| Median [Min, Max]                  | 171 [110, 181] | 188 [181, 195] | 201 [195, 209] | 221 [209, 377] | 194 [110, 377] |
| <b>25.1-29.9, kg/m<sup>2</sup></b> |                |                |                |                |                |
| Mean (SD)                          | 169 (10.5)     | 188 (3.87)     | 202 (3.97)     | 227 (20.6)     | 198 (23.7)     |
| Median [Min, Max]                  | 172 [105, 181] | 189 [181, 195] | 201 [195, 209] | 220 [209, 388] | 197 [105, 388] |
| <b>&gt;=30, kg/m<sup>2</sup></b>   |                |                |                |                |                |
| Mean (SD)                          | 170 (9.67)     | 188 (3.90)     | 202 (4.02)     | 226 (16.3)     | 195 (22.6)     |
| Median [Min, Max]                  | 172 [131, 181] | 188 [181, 195] | 202 [195, 209] | 221 [209, 318] | 194 [131, 318] |
| <b>HYP</b>                         |                |                |                |                |                |
| Mean (SD)                          | 169 (11.1)     | 188 (4.03)     | 201 (3.94)     | 228 (22.0)     | 197 (25.1)     |
| Median [Min, Max]                  | 172 [110, 181] | 188 [181, 195] | 201 [195, 209] | 222 [209, 377] | 196 [110, 377] |
| <b>Non-HYP</b>                     |                |                |                |                |                |
| Mean (SD)                          | 169 (10.2)     | 188 (3.81)     | 202 (3.95)     | 226 (19.9)     | 196 (23.5)     |
| Median [Min, Max]                  | 171 [105, 181] | 188 [181, 195] | 202 [195, 209] | 221 [209, 388] | 194 [105, 388] |
| <b>Never smoker</b>                |                |                |                |                |                |
| Mean (SD)                          | 168 (10.2)     | 188 (3.80)     | 202 (3.99)     | 228 (22.0)     | 196 (24.4)     |
| Median [Min, Max]                  | 170 [105, 181] | 188 [181, 195] | 202 [195, 209] | 221 [209, 388] | 195 [105, 388] |
| <b>Former smoker</b>               |                |                |                |                |                |
| Mean (SD)                          | 171 (9.25)     | 189 (3.81)     | 202 (3.72)     | 228 (23.5)     | 198 (23.9)     |
| Median [Min, Max]                  | 173 [129, 181] | 189 [182, 195] | 201 [195, 209] | 221 [209, 356] | 197 [129, 356] |
| <b>Current smoker</b>              |                |                |                |                |                |
| Mean (SD)                          | 168 (11.8)     | 188 (4.09)     | 201 (4.09)     | 224 (13.1)     | 193 (23.3)     |
| Median [Min, Max]                  | 172 [110, 181] | 188 [181, 195] | 201 [195, 209] | 221 [209, 288] | 191 [110, 288] |
